# Supplementary material
Source: PubMed Central journal article supplement (PMC1690491)
Supplement: 10670956s01.pdf [file 10670956s01.pdf]

This is an appendix to the paper by Kern Reeve *et al.* 2000 Genetic support for the evolutionary theory of reproductive transactions in social wasps.

*Proc. R. Soc. Lond. B* **267**, 75–79.

Electronic appendices are refereed with the paper. However, no attempt has been made to impose a uniform editorial style on the appendix.

## Appendix A

Let  $p_s(t)$  be the staying incentive expressed as the minimal fraction of all present + future dyad reproduction required by the beta to stay and help the alpha, this fraction being a function of the time  $t$  in the colony cycle.

Let  $T$  be the time at which workers emerge, and let  $p(t)$  be the 'instantaneous' staying incentive, i.e. the fraction of the batch of new brood at time  $t$  that the beta requires. These two staying incentives are related by the equation

$$p_s(t) = \frac{\int_t^T p(x) dx}{T - t} \quad (1)$$

Differentiating both sides with respect to the time  $t$ , we obtain

$$\frac{\partial p_s(t)}{\partial t} = \frac{\int_t^T p(x) dx}{(T - t)^2} - \frac{p(t)}{T - t} \quad (2)$$

Thus, if the present + future staying incentive is always negative (i.e. the left-hand side of [2] is negative), then the numerator on the right-hand side expression must be negative, entailing that the instantaneous staying incentive  $p(t)$  must, on average, decline with time (because the instantaneous staying incentive averaged across future times must be less than the current instantaneous staying incentive).
